# Supplementary material for: Spectrophotometric Color Measurement to Assess Temperature of Exposure in Cortical and Medullar Heated Human Bones: A Preliminary Study
Source: MDPI journal article supplement (doi:10.3390/diagnostics10110979), 2020-11-20
Supplement: s1 [file s1]

## Supplementary figure 1

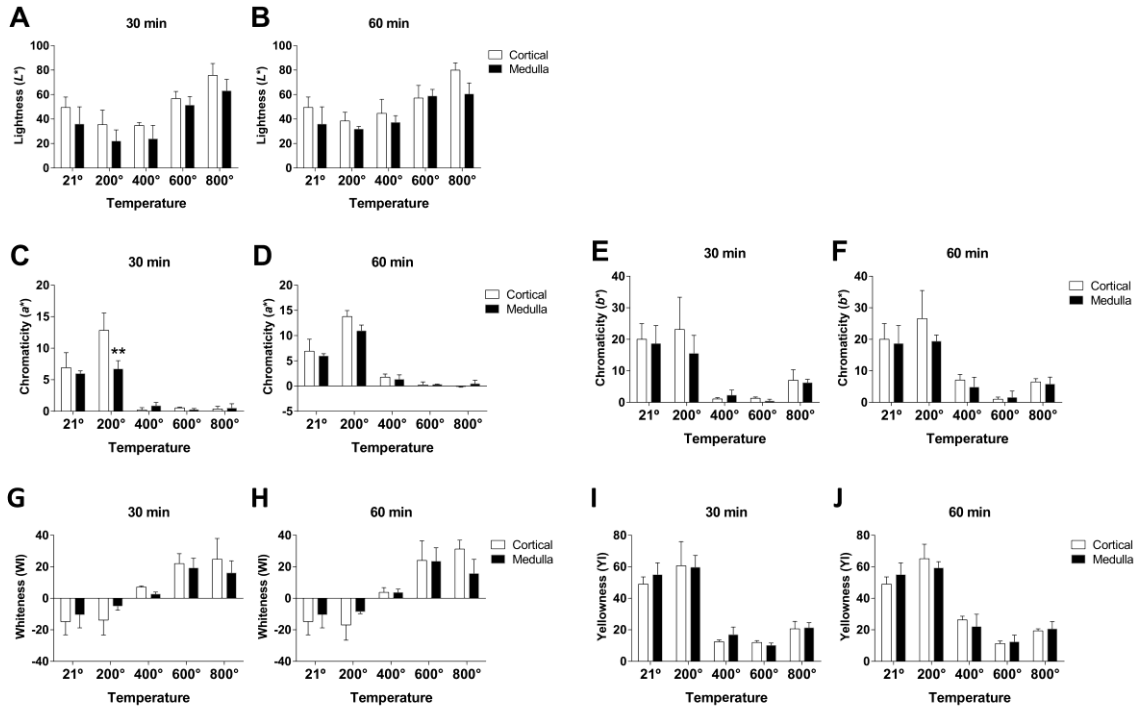

**Figure S1.** Spectrophotometric color measurements in cortical and medullar bone zones (L\*, a\*, b\*, WI and YI) in control and those heated at 200, 400, 600 and 800 °C for 30 and 60 min. Histograms represent means  $\pm$  SEM ( $n = 4$ ). ANOVA: \*\* $p < 0.01$  vs. control group.
